# Supplementary material
Source: Springer Nature journal article supplement (https://www.springermedizin.de/resource/supplementary/12933_2011_348_MOESM1_ESM.pdf/9538210)

**The mean serum H-FABP-95% CI**

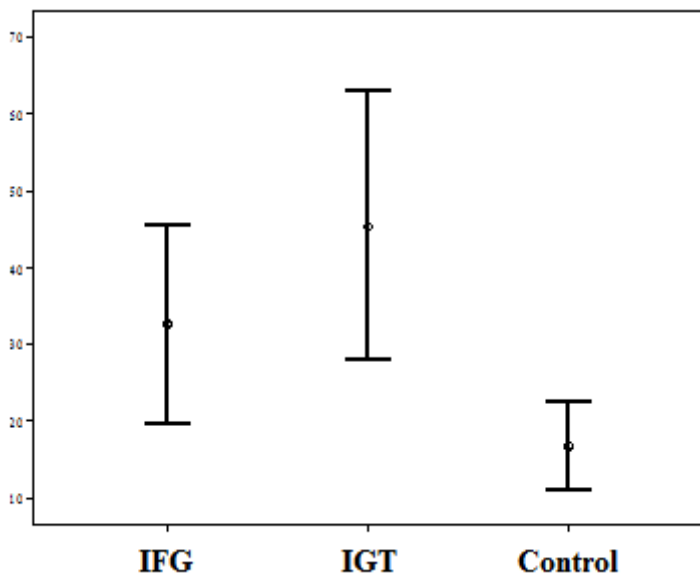

Supplement: MOESM1 [file 9538210]
